# Supplementary material for: Notch signalling in solid tumours: a little bit of everything but not all the time
Source: Springer Nature journal article supplement (doi:10.1038/nrc3035), 2011-04-14
Supplement: 41568_2011_BFnrc3035_MOESM1_ESM.pdf [file 41568_2011_BFnrc3035_MOESM1_ESM.pdf]

Supplementary information S1 | **Role of Notch in solid tumors**

| Tumor         | Observation                                                                                                 | Role of Notch                                       | Refs          |
|---------------|-------------------------------------------------------------------------------------------------------------|-----------------------------------------------------|---------------|
| Breast Cancer | Increased NOTCH 4 and decreased NOTCH 1 activity in the tumor initiating cell population                    | Oncogenic and tumor suppressive                     | <sup>1</sup>  |
|               | Increased expression of NOTCH receptors, ligands and HES-1 and HES-5                                        | Tumor progression                                   | <sup>2</sup>  |
|               | Increased Notch mediated EMT under hypoxic conditions                                                       | Tumor maintenance and progression                   | <sup>3</sup>  |
|               | Increased Notch signaling is associated with increased metastatic potential of breast cancer cells          | Tumor progression                                   | <sup>4</sup>  |
|               | Increased NOTCH activation in ER negative breast cancer results in increased cell proliferation             | Drug resistance and tumor progression               | <sup>5</sup>  |
|               | NOTCH 2 over expression associated with invasive breast cancer                                              | Tumor progression                                   | <sup>6</sup>  |
|               | Increased JAG 1 expression correlated with recurrence in lymph node negative breast cancer                  | Tumor progression                                   | <sup>7</sup>  |
|               | Notch activation induces Slug, promotes tumor growth and metastases and inhibits anoikis                    | Tumor progression                                   | <sup>8</sup>  |
|               | Notch 2 signaling inhibits xenograft growth and promotes apoptosis. Notch 4 signaling promotes tumor growth | Isoform specific<br>Oncogenic and tumor suppressive | <sup>9</sup>  |
|               | Increased JAG1 indicates poor prognosis                                                                     | Tumor progression                                   | <sup>10</sup> |
|               | Increased nuclear accumulation of NICD and increased signaling                                              | Tumor progression                                   | <sup>11</sup> |
|               | Increased NOTCH 1 and decreased NOTCH 2 in poorly differentiated tumors                                     | Isoform specific<br>Oncogenic and tumor suppressive | <sup>12</sup> |
|               | Loss of NUMB activity resulting in                                                                          | Tumor progression                                   | <sup>13</sup> |

|                   |                                                                                                        |                   |       |
|-------------------|--------------------------------------------------------------------------------------------------------|-------------------|-------|
|                   | increased Notch signaling                                                                              |                   |       |
| Colorectal cancer | Somatic mutations of FBXW7 which can result in increased NOTCH activity                                | Oncogenic         | 14    |
|                   | Increased Jagged (Notch Signaling) due to active Wnt                                                   | Oncogenic         | 15,16 |
|                   | Increased NOTCH 1 activation confers chemoresistance                                                   | Drug resistance   | 17    |
|                   | Notch inhibits the expression of the tumor suppressor KLF4                                             | Oncogenic         | 18    |
|                   | Increased expression of JAGGED1, NOTCH 1 and HES-1                                                     | Tumor progression | 19    |
|                   | Notch signaling can overcome taxane induced mitotic arrest and apoptosis                               | Drug Resistance   | 20    |
|                   | Increased JAGGED 1 results in loss of contact inhibition and goblet cell differentiation               | Oncogenic         | 21    |
| Prostate cancer   | Activation of Notch signaling results in inhibition of growth                                          | Tumor suppressor  | 22    |
|                   | Loss of Notch 1 resulting in loss of PTEN expression                                                   | Tumor suppressor  | 23    |
|                   | Loss of Notch 1 results in reduced MMP-9 and uPA and decreased invasion                                | Tumor progression | 24    |
|                   | Increased Jagged 1                                                                                     | Tumor progression | 25    |
|                   | Increased Jagged 1 associated with metastases and recurrence                                           | Tumor progression | 26    |
|                   | Notch signaling important for bone metastasis                                                          | Tumor progression | 27    |
| Liver cancer      | Lower expression of NOTCH and JAGGED correlates with increased nuclear b CATENIN and tumor progression | Tumor Suppressor  | 28    |
|                   | Notch signaling induces p53 by inhibiting the AKT/HDM2 mediated degradation                            | Drug Resistance   | 29    |

|                   |                                                                                                                                      |                                 |    |
|-------------------|--------------------------------------------------------------------------------------------------------------------------------------|---------------------------------|----|
|                   | and sensitize the cells to TRAIL mediated apoptosis                                                                                  |                                 |    |
|                   | Loss of NOTCH 3 increases p53 and cell death by doxorubicin                                                                          | Drug Resistance                 | 30 |
|                   | Inhibition of Notch signaling by GSI results in reduced proliferation in HepG2 cells                                                 | Tumor progression               | 31 |
|                   | Notch expression deregulated                                                                                                         | Tumor progression               | 32 |
|                   | NOTCH3, JAGGED 1, DELTA like 1 and HES-1 overexpressed in HepG2                                                                      | Tumor progression               | 33 |
|                   | <i>Notch 1</i> overexpressed in cholangiocarcinoma                                                                                   | Tumor progression               | 34 |
|                   | NOTCH 1 overexpression results in cell cycle arrest and increased p53 levels                                                         | Tumor Suppressor                | 35 |
| Pancreatic cancer | Inhibition of NOTCH 3 inactivates PI3K/AKT and sensitizes the cells to gemcitabine                                                   | Drug Resistance                 | 36 |
|                   | Active NOTCH signaling synergizes with KRAS in acinar cells for initiation and progression of PanINs                                 | Tumor Progression               | 37 |
|                   | Inhibition of cell proliferation by exosomal nano particles requires downregulation of Notch                                         | Drug Resistance                 | 38 |
|                   | Anti-tumor activity of TW-37 (small molecule inhibitor of Bcl-2) acts by attenuating Notch signaling                                 | Drug Resistance                 | 39 |
|                   | Notch signaling linked to the EMT phenotype (cancer stem cells) and resistance to gemcitabine.                                       | Drug resistance                 | 40 |
|                   | Over-expression of NOTCH1, 2; JAGGED2; DLL3 (amplification) and DLL4 suggesting a role for ligand dependent Notch signaling in tumor | Oncogenic and tumor progression | 41 |

|              |                                                                                                                                                                |                               |       |
|--------------|----------------------------------------------------------------------------------------------------------------------------------------------------------------|-------------------------------|-------|
|              | initiation and maintenance                                                                                                                                     |                               |       |
|              | GSI treatment inhibits tumor formation in a mouse model of PDAC                                                                                                | Oncogenic                     | 42    |
|              | MMP-7 induced NOTCH activation leads to acinar to ductal transdifferentiation and increases risk of tumorigenesis                                              | Oncogenic                     | 43    |
|              | NOTCH 3 expression correlates with poor prognosis                                                                                                              | Tumor progression             | 44    |
|              | Notch signaling is essential for DMBA (dimethyl benzathracene) induced pancreatic cancer in mice                                                               | Oncogenic                     | 45    |
|              | NOTCH is down-regulated by curcumin, genistein treatment leading to growth inhibition and apoptosis                                                            | Drug resistance               | 46-48 |
|              | Down-regulation of NOTCH results in inhibition of NF-kB, MMP-9 and VEGF and reduced metastasis                                                                 | Tumor progression             | 49    |
|              | Notch signaling causes neurovascular progression in pancreatic cancer and causes an invasive phenotype                                                         | Tumor progression             | 50    |
|              | Ablation of Notch 2, but not Notch 1 leads to abrogation of PanIN progression and increased survival                                                           | Tumor progression             | 51    |
| Glioblastoma | Notch signaling increases radio resistance of glioma stem cells                                                                                                | Radioresistance               | 52    |
|              | NOTCH1 and NOTCH3 are over-expressed in cell lines and tumors, along with HES-1 and/or HES-2, and HEY-1 expression increases with GBM grade                    | Tumor progression             | 53    |
|              | Knockdown of <i>NOTCH1</i> resulted in growth suppression, increased apoptosis, and morphological changes, indicating Notch has a role in maintaining cells in | Tumor maintenance/progression | 54    |

|                                |                                                                                                                                                       |                   |       |
|--------------------------------|-------------------------------------------------------------------------------------------------------------------------------------------------------|-------------------|-------|
|                                | an undifferentiated state                                                                                                                             |                   |       |
|                                | Knockdown of <i>DLL1</i> or <i>JAG1</i> resulted in decreased cell growth and/or cell death                                                           | Tumor progression | 55    |
|                                | Non-canonical Notch signaling through the ligand DNER has a differentiating and tumor suppressive effect in GBM                                       | Tumor Suppressor  | 56    |
| Cervical cancer                | NOTCH activation activates the NF- $\kappa$ B via association with IKK $\alpha$ and protects CasKi cells against cisplatin induced apoptosis          | Drug Resistance   | 57    |
|                                | Co-activation of Notch and NF- $\kappa$ B pathways                                                                                                    | Tumor progression | 58    |
|                                | Disruption of <i>NOTCH</i> by HPV-16 integration - NOTCH1 activation is seen only in late stages of HPV-positive tumors                               | Tumor progression | 59,60 |
|                                | NOTCH activity is correlated with tumor progression and inhibition of Notch with GSI resulted in decreased cell proliferation and increased apoptosis | Tumor progression | 56    |
| Squamous cell carcinoma (Oral) | NOTCH 1 levels correlated to LN metastasis and invasion                                                                                               | Tumor progression | 61    |
|                                | Overexpression of NOTCH results in cell cycle arrest and apoptosis. There is decrease in b-CATENIN, SKP and BCL-2 and increase in p21 and p53         | Tumor Suppressor  | 62    |
|                                | Amplification and overexpression of <i>JAG1</i> , <i>RBP/SUH</i> , <i>FJX1</i> , <i>DLL1</i> and <i>NOTCH 4</i>                                       | Tumor progression | 63    |
| Skin                           | NOTCH 1 is down regulated in UV-induced squamous cell carcinoma                                                                                       | Tumor Suppressor  | 64    |
|                                | Mice expressing dominant negative MAML in the epidermis develop                                                                                       | Tumor Suppressor  | 65    |

|                 |                                                                                                                         |                                   |                  |
|-----------------|-------------------------------------------------------------------------------------------------------------------------|-----------------------------------|------------------|
|                 | spontaneous SCC with increased nuclear b-CATENIN and CYCLIN-D1 which is also observed in human SCC                      |                                   |                  |
| Head and neck   | High NOTCH1 and STAT3 correlate with cisplatin resistance indicating active survival pathways                           | Drug Resistance                   | <sup>66</sup>    |
| Medulloblastoma | High <i>NOTCH2</i> , but not <i>NOTCH1</i> transcripts                                                                  | Tumor progression                 | <sup>67</sup>    |
|                 | <i>HES-1</i> expression negatively associated with patient survival                                                     | Tumor progression                 | <sup>67</sup>    |
|                 | Blocking NOTCH with GSI decreases cell proliferation and increases apoptosis                                            | Tumor Maintenance and progression | <sup>68</sup>    |
| Melanoma        | Tumors have increased NOTCH activity compared to non-transformed controls                                               | Tumor progression                 | <sup>69,70</sup> |
|                 | NOTCH1 activation increases metastasis and tumor cell survival <i>in vivo</i>                                           | Tumor maintenance and progression | <sup>71,72</sup> |
|                 | NOTCH over-expression leads to increased cell proliferation and dysregulated adhesion and migration                     | Tumor maintenance and progression | <sup>69,70</sup> |
|                 | Blocking NOTCH activation suppresses melanoma growth <i>in vitro</i> and <i>in vivo</i>                                 | Tumor progression                 | <sup>71,72</sup> |
| Lung Cancer     | NOTCH3 expression seen in 39% of resected human lung tumors                                                             | Tumor progression                 | <sup>73</sup>    |
|                 | One-third of NSCLC have increased NOTCH activity due to gain-of-function mutations or loss of NUMB                      | Oncogenic/ Tumor Progression      | <sup>74</sup>    |
|                 | Blocking interaction between NOTCH3 and JAG1 results in increased apoptosis and decreased transcription of <i>HEY-1</i> | Tumor Progression                 | <sup>75,76</sup> |
|                 | Over-expression of NOTCH1 or NOTCH2 in SCLC cells results in growth arrest                                              | Tumor Suppressor                  | <sup>77</sup>    |

1. Harrison, H., *et al.* Regulation of breast cancer stem cell activity by signaling through the Notch4 receptor. *Cancer Res* **70**, 709-718 (2010).
2. Mittal, S., Subramanyam, D., Dey, D., Kumar, R. & Rangarajan, A. Cooperation of Notch and Ras/MAPK signaling pathways in human breast carcinogenesis. *Mol Cancer* **8**, 128 (2009).
3. Chen, J., Imanaka, N. & Griffin, J.D. Hypoxia potentiates Notch signaling in breast cancer leading to decreased E-cadherin expression and increased cell migration and invasion. *Br J Cancer* **102**, 351-360 (2010).
4. Nam, D.H., *et al.* Activation of notch signaling in a xenograft model of brain metastasis. *Clin Cancer Res* **14**, 4059-4066 (2008).
5. Lee, C.W., Raskett, C.M., Prudovsky, I. & Altieri, D.C. Molecular dependence of estrogen receptor-negative breast cancer on a notch-survivin signaling axis. *Cancer Res* **68**, 5273-5281 (2008).
6. Florena, A.M., *et al.* Associations between Notch-2, Akt-1 and HER2/neu expression in invasive human breast cancer: a tissue microarray immunophenotypic analysis on 98 patients. *Pathobiology* **74**, 317-322 (2007).
7. Reedijk, M., *et al.* JAG1 expression is associated with a basal phenotype and recurrence in lymph node-negative breast cancer. *Breast Cancer Res Treat* **111**, 439-448 (2008).
8. Leong, K., *et al.* Jagged1-mediated Notch activation induces epithelial-to-mesenchymal transition through Slug-induced repression of E-cadherin. *J Exp Med* **204**, 2935-2948 (2007).
9. O'Neill, C.F., *et al.* Notch2 signaling induces apoptosis and inhibits human MDA-MB-231 xenograft growth. *Am J Pathol* **171**, 1023-1036 (2007).
10. Reedijk, M., *et al.* High-level coexpression of JAG1 and NOTCH1 is observed in human breast cancer and is associated with poor overall survival. *Cancer Res* **65**, 8530-8537 (2005).
11. Stylianou, S., Clarke, R.B. & Brennan, K. Aberrant activation of notch signaling in human breast cancer. *Cancer Res* **66**, 1517-1525 (2006).  
**This paper shows accumulation of NICD in human breast carcinomas and demonstrates that increasing Notch signaling is sufficient to transform normal breast epithelial cells, while attenuate of the pathway reverts this phenotype.**
12. Parr, C., Watkins, G. & Jiang, W.G. The possible correlation of Notch-1 and Notch-2 with clinical outcome and tumour clinicopathological parameters in human breast cancer. *Int J Mol Med* **14**, 779-786 (2004).
13. Pece, S., *et al.* Loss of negative regulation by Numb over Notch is relevant to human breast carcinogenesis. *J Cell Biol* **167**, 215-221 (2004).
14. Miyaki, M., *et al.* Somatic mutations of the CDC4 (FBXW7) gene in hereditary colorectal tumors. *Oncology* **76**, 430-434 (2009).
15. Rodilla, V., *et al.* Jagged1 is the pathological link between Wnt and Notch pathways in colorectal cancer. *Proc Natl Acad Sci U S A* **106**, 6315-6320 (2009).
16. Fre, S., *et al.* Notch and Wnt signals cooperatively control cell proliferation and tumorigenesis in the intestine. *Proc Natl Acad Sci U S A* **106**, 6309-6314 (2009).
17. Meng, R.D., *et al.* gamma-Secretase inhibitors abrogate oxaliplatin-induced activation of the Notch-1 signaling pathway in colon cancer cells resulting in enhanced chemosensitivity. *Cancer Res* **69**, 573-582 (2009).

18. Ghaleb, A.M., Aggarwal, G., Bialkowska, A.B., Nandan, M.O. & Yang, V.W. Notch inhibits expression of the Kruppel-like factor 4 tumor suppressor in the intestinal epithelium. *Mol Cancer Res* **6**, 1920-1927 (2008).
19. Reedijk, M., *et al.* Activation of Notch signaling in human colon adenocarcinoma. *Int J Oncol* **33**, 1223-1229 (2008).
20. Akiyoshi, T., *et al.* Gamma-secretase inhibitors enhance taxane-induced mitotic arrest and apoptosis in colon cancer cells. *Gastroenterology* **134**, 131-144 (2008).
21. Guilmeau, S., Flandez, M., Mariadason, J.M. & Augenlicht, L.H. Heterogeneity of Jagged1 expression in human and mouse intestinal tumors: implications for targeting Notch signaling. *Oncogene* **29**, 992-1002 (2010).
22. Shou, J., Ross, S., Koeppen, H., de Sauvage, F.J. & Gao, W.Q. Dynamics of notch expression during murine prostate development and tumorigenesis. *Cancer Res* **61**, 7291-7297 (2001).
23. Whelan, J.T., Kellogg, A., Shewchuk, B.M., Hewan-Lowe, K. & Bertrand, F.E. Notch-1 signaling is lost in prostate adenocarcinoma and promotes PTEN gene expression. *J Cell Biochem* **107**, 992-1001 (2009).
24. Bin Hafeez, B., *et al.* Targeted knockdown of Notch1 inhibits invasion of human prostate cancer cells concomitant with inhibition of matrix metalloproteinase-9 and urokinase plasminogen activator. *Clin Cancer Res* **15**, 452-459 (2009).
25. Zhang, Y., *et al.* Down-regulation of Jagged-1 induces cell growth inhibition and S phase arrest in prostate cancer cells. *Int J Cancer* **119**, 2071-2077 (2006).
26. Santagata, S., *et al.* JAGGED1 expression is associated with prostate cancer metastasis and recurrence. *Cancer Res* **64**, 6854-6857 (2004).
27. Zayzafoon, M., Abdulkadir, S.A. & McDonald, J.M. Notch signaling and ERK activation are important for the osteomimetic properties of prostate cancer bone metastatic cell lines. *J Biol Chem* **279**, 3662-3670 (2004).
28. Wang, M., *et al.* Expression of Notch1, Jagged1 and beta-catenin and their clinicopathological significance in hepatocellular carcinoma. *Neoplasma* **56**, 533-541 (2009).
29. Wang, C., *et al.* Notch1 signaling sensitizes tumor necrosis factor-related apoptosis-inducing ligand-induced apoptosis in human hepatocellular carcinoma cells by inhibiting Akt/Hdm2-mediated p53 degradation and up-regulating p53-dependent DR5 expression. *J Biol Chem* **284**, 16183-16190 (2009).
30. Giovannini, C., *et al.* Selective ablation of Notch3 in HCC enhances doxorubicin's death promoting effect by a p53 dependent mechanism. *J Hepatol* **50**, 969-979 (2009).
31. Suwanjonee, S., Wongchana, W. & Palaga, T. Inhibition of gamma-secretase affects proliferation of leukemia and hepatoma cell lines through Notch signaling. *Anticancer Drugs* **19**, 477-486 (2008).
32. Gramantieri, L., *et al.* Aberrant Notch3 and Notch4 expression in human hepatocellular carcinoma. *Liver Int* **27**, 997-1007 (2007).
33. Giovannini, C., Lacchini, M., Gramantieri, L., Chieco, P. & Bolondi, L. Notch3 intracellular domain accumulates in HepG2 cell line. *Anticancer Res* **26**, 2123-2127 (2006).



34. Ishimura, N., Bronk, S.F. & Gores, G.J. Inducible nitric oxide synthase up-regulates Notch-1 in mouse cholangiocytes: implications for carcinogenesis. *Gastroenterology* **128**, 1354-1368 (2005).
35. Qi, R., *et al.* Notch1 signaling inhibits growth of human hepatocellular carcinoma through induction of cell cycle arrest and apoptosis. *Cancer Res* **63**, 8323-8329 (2003).
36. Yao, J. & Qian, C. Inhibition of Notch3 enhances sensitivity to gemcitabine in pancreatic cancer through an inactivation of PI3K/Akt-dependent pathway. *Med Oncol* (2009).
37. De La, O.J., *et al.* Notch and Kras reprogram pancreatic acinar cells to ductal intraepithelial neoplasia. *Proc Natl Acad Sci U S A* **105**, 18907-18912 (2008).
38. Ristorcelli, E., Beraud, E., Mathieu, S., Lombardo, D. & Verine, A. Essential role of Notch signaling in apoptosis of human pancreatic tumoral cells mediated by exosomal nanoparticles. *Int J Cancer* **125**, 1016-1026 (2009).
39. Wang, Z., *et al.* TW-37, a small-molecule inhibitor of Bcl-2, inhibits cell growth and induces apoptosis in pancreatic cancer: involvement of Notch-1 signaling pathway. *Cancer Res* **69**, 2757-2765 (2009).
40. Wang, Z., *et al.* Acquisition of epithelial-mesenchymal transition phenotype of gemcitabine-resistant pancreatic cancer cells is linked with activation of the notch signaling pathway. *Cancer Research* **69**, 2400-2407 (2009).
41. Mullendore, M.E., *et al.* Ligand-dependent Notch signaling is involved in tumor initiation and tumor maintenance in pancreatic cancer. *Clin Cancer Res* **15**, 2291-2301 (2009).
42. Plentz, R., *et al.* Inhibition of gamma-secretase activity inhibits tumor progression in a mouse model of pancreatic ductal adenocarcinoma. *Gastroenterology* **136**, 1741-1749 e1746 (2009).
43. Sawey, E.T., Johnson, J.A. & Crawford, H.C. Matrix metalloproteinase 7 controls pancreatic acinar cell transdifferentiation by activating the Notch signaling pathway. *Proc Natl Acad Sci U S A* **104**, 19327-19332 (2007).
44. Doucas, H., *et al.* Expression of nuclear Notch3 in pancreatic adenocarcinomas is associated with adverse clinical features, and correlates with the expression of STAT3 and phosphorylated Akt. *J Surg Oncol* **97**, 63-68 (2008).
45. Kimura, K., *et al.* Activation of Notch signaling in tumorigenesis of experimental pancreatic cancer induced by dimethylbenzanthracene in mice. *Cancer Sci* **98**, 155-162 (2007).
46. Wang, Z., Zhang, Y., Banerjee, S., Li, Y. & Sarkar, F.H. Notch-1 down-regulation by curcumin is associated with the inhibition of cell growth and the induction of apoptosis in pancreatic cancer cells. *Cancer* **106**, 2503-2513 (2006).
47. Wang, Z., *et al.* Down-regulation of Notch-1 contributes to cell growth inhibition and apoptosis in pancreatic cancer cells. *Mol Cancer Ther* **5**, 483-493 (2006).
48. Wang, Z., Zhang, Y., Banerjee, S., Li, Y. & Sarkar, F.H. Inhibition of nuclear factor kappaB activity by genistein is mediated via Notch-1 signaling pathway in pancreatic cancer cells. *Int J Cancer* **118**, 1930-1936 (2006).
49. Wang, Z., *et al.* Down-regulation of notch-1 inhibits invasion by inactivation of nuclear factor-kappaB, vascular endothelial growth factor, and matrix metalloproteinase-9 in pancreatic cancer cells. *Cancer Res* **66**, 2778-2784 (2006).

50. Buchler, P., *et al.* The Notch signaling pathway is related to neurovascular progression of pancreatic cancer. *Ann Surg* **242**, 791-800, discussion 800-791 (2005).
51. Mazur, P.K., *et al.* Notch2 is required for progression of pancreatic intraepithelial neoplasia and development of pancreatic ductal adenocarcinoma. *Proc Natl Acad Sci U S A* **107**, 13438-13443 (2010).
52. Wang, J., *et al.* Notch promotes radioresistance of glioma stem cells. *Stem Cells* **28**, 17-28 (2010).
53. Hulleman, E., *et al.* A role for the transcription factor HEY1 in glioblastoma. *J Cell Mol Med* **13**, 136-146 (2009).
54. Kanamori, M., *et al.* Contribution of Notch signaling activation to human glioblastoma multiforme. *J Neurosurg* **106**, 417-427 (2007).
55. Purow, B., *et al.* Expression of Notch-1 and its ligands, Delta-like-1 and Jagged-1, is critical for glioma cell survival and proliferation. *Cancer Res* **65**, 2353-2363 (2005).  
**The authors show that Notch-1, Delta-like-1, and Jagged-1 are over-expressed in glioma cell lines and primary human gliomas and knockdown of these induces apoptosis. In addition, they show that knockdown of Notch-1 or Delta-like-1 is sufficient to prolong survival in a murine orthotopic brain tumor model.**
56. Sun, P., *et al.* DNER, an epigenetically modulated gene, regulates glioblastoma-derived neurosphere cell differentiation and tumor propagation. *Stem Cells* **27**, 1473-1486 (2009).
57. Song, L.L., *et al.* Notch-1 associates with IKK $\alpha$  and regulates IKK activity in cervical cancer cells. *Oncogene* **27**, 5833-5844 (2008).
58. Ramdass, B., *et al.* Coexpression of Notch1 and NF-kappaB signaling pathway components in human cervical cancer progression. *Gynecol Oncol* **104**, 352-361 (2007).
59. Thorland, E.C., Myers, S.L., Gostout, B.S. & Smith, D.I. Common fragile sites are preferential targets for HPV16 integrations in cervical tumors. *Oncogene* **22**, 1225-1237 (2003).
60. Veeraraghavalu, K., *et al.* Papillomavirus-mediated neoplastic progression is associated with reciprocal changes in JAGGED1 and manic fringe expression linked to notch activation. *J Virol* **78**, 8687-8700 (2004).
61. Joo, Y.H., Jung, C.K., Kim, M.S. & Sun, D.I. Relationship between vascular endothelial growth factor and Notch1 expression and lymphatic metastasis in tongue cancer. *Otolaryngol Head Neck Surg* **140**, 512-518 (2009).
62. Duan, L., Yao, J., Wu, X. & Fan, M. Growth suppression induced by Notch1 activation involves Wnt-beta-catenin down-regulation in human tongue carcinoma cells. *Biol Cell* **98**, 479-490 (2006).
63. Snijders, A.M., *et al.* Rare amplicons implicate frequent deregulation of cell fate specification pathways in oral squamous cell carcinoma. *Oncogene* **24**, 4232-4242 (2005).
64. Panelos, J., *et al.* Photoexposure discriminates Notch 1 expression in human cutaneous squamous cell carcinoma. *Mod Pathol* **21**, 316-325 (2008).
65. Proweller, A., *et al.* Impaired notch signaling promotes de novo squamous cell carcinoma formation. *Cancer Res* **66**, 7438-7444 (2006).
66. Gu, F., *et al.* Expression of Stat3 and Notch1 is associated with cisplatin resistance in head and neck squamous cell carcinoma. *Oncol Rep* **23**, 671-676 (2010).

67. Fan, X., *et al.* Notch1 and notch2 have opposite effects on embryonal brain tumor growth. *Cancer Res* **64**, 7787-7793 (2004).
68. Hallahan, A., *et al.* The SmoA1 mouse model reveals that notch signaling is critical for the growth and survival of sonic hedgehog-induced medulloblastomas. *Cancer Res* **64**, 7794-7800 (2004).
69. Hoek, K., *et al.* Expression profiling reveals novel pathways in the transformation of melanocytes to melanomas. *Cancer Res* **64**, 5270-5282 (2004).
70. Pinnix, C., *et al.* Active Notch1 confers a transformed phenotype to primary human melanocytes. *Cancer Res* **69**, 5312-5320 (2009).
71. Liu, Z., *et al.* Notch1 signaling promotes primary melanoma progression by activating mitogen-activated protein kinase/phosphatidylinositol 3-kinase-Akt pathways and up-regulating N-cadherin expression. *Cancer Res* **66**, 4182-4190 (2006).
72. Balint, K., *et al.* Activation of Notch1 signaling is required for beta-catenin-mediated human primary melanoma progression. *J Clin Invest* **115**, 3166-3176 (2005).
73. Haruki, N., *et al.* Dominant-negative Notch3 receptor inhibits mitogen-activated protein kinase pathway and the growth of human lung cancers. *Cancer Res* **65**, 3555-3561 (2005).
74. Westhoff, B., *et al.* Alterations of the Notch pathway in lung cancer. *Proc Natl Acad Sci U S A* **106**, 22293-22298 (2009).
75. Konishi, J., *et al.* Gamma-secretase inhibitor prevents Notch3 activation and reduces proliferation in human lung cancers. *Cancer Res* **67**, 8051-8057 (2007).
76. Lin, L., *et al.* Targeting specific regions of the Notch3 ligand-binding domain induces apoptosis and inhibits tumor growth in lung cancer. *Cancer Res* **70**, 632-638 (2010).
77. Sriuranpong, V., *et al.* Notch signaling induces cell cycle arrest in small cell lung cancer cells. *Cancer Res* **61**, 3200-3205 (2001).
